# Supplementary material for: Free-standing graphene oxide membrane works in tandem with confined interfacial polymerization of polyamides towards excellent desalination and chlorine tolerance performance
Source: Royal Society of Chemistry journal article supplement (doi:10.1039/d1na00513h), 2021-11-19
Supplement: d1na00513h1.pdf [file d1na00513h1.pdf]

## Supporting Information For

### Free standing graphene oxide membrane works in tandem with confined interfacial polymerization of polyamide towards excellent desalination and chlorine tolerance performance through Forward Osmosis.

Subhasish Maiti <sup>a</sup>, Suryasarathi Bose<sup>\*a</sup>

<sup>a</sup> Department of Materials Engineering, Indian Institute of Science, Bangalore, Karnataka, India-560012

\*corresponding author: [sbose@iisc.ac.in](mailto:sbose@iisc.ac.in)

#### Characterization of free-standing GO:

Structural properties of free-standing GO were analysed by Xpert Pro X-ray diffractometer using Cu K $\alpha$  as a source. The free-standing GO was scanned from 5° to 80° with a step size of 0.049°. The XRD pattern of free-standing GO is shown in figure S1. The prominent peak at 10.4° is observed is corresponding to the oxidized graphitic peak.

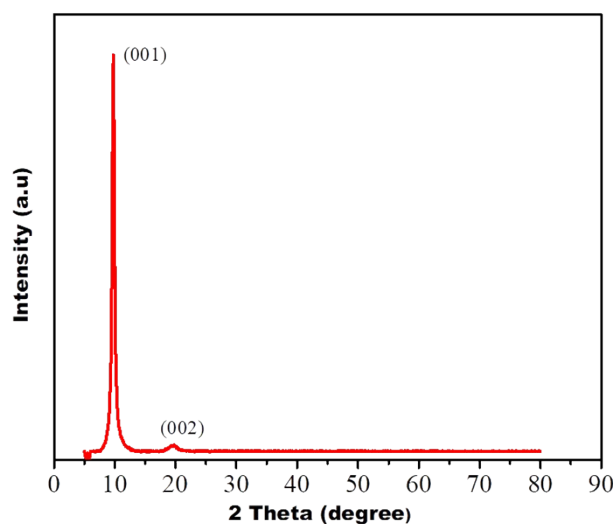

**Figure S1:** XRD pattern of free-standing GO.

The functional groups present in the free-standing GO were assessed using FTIR Spectra. From figure S2 it is clearly observed that peaks at 1720 cm<sup>-1</sup>, 1625 cm<sup>-1</sup> and 1050 cm<sup>-1</sup> are characteristic peaks of carboxylic acid carbonyl stretching, aromatic C=C stretching and

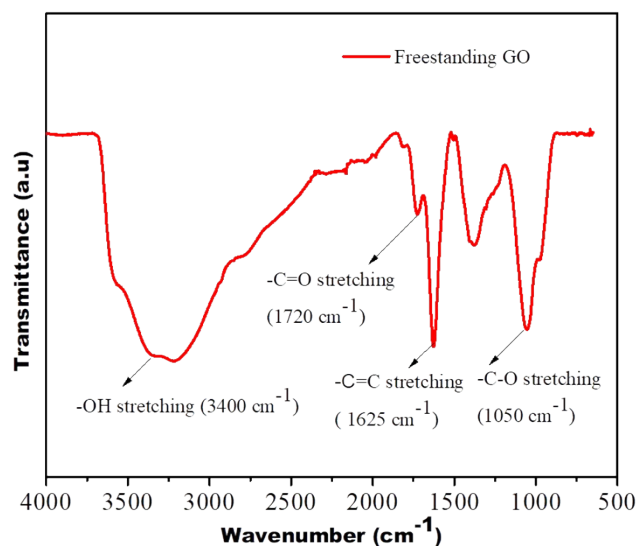

**Figure S2:** FTIR Spectrum of free standing GO.

epoxy C-O stretching respectively. Carboxylic acid group and hydroxyl groups are further validated by the appearance of an intense broad peak around  $3400\text{ cm}^{-1}$ .

The surface and cross-sectional morphology of free-standing GO were characterized using a scanning electron microscope (SEM) by Ultra55 FESEM Karl Zeiss as shown in figure S3. From the cross-sectional image it can be stated that thickness of free-standing GO is approximately  $7\text{-}8\text{ }\mu\text{m}$ .

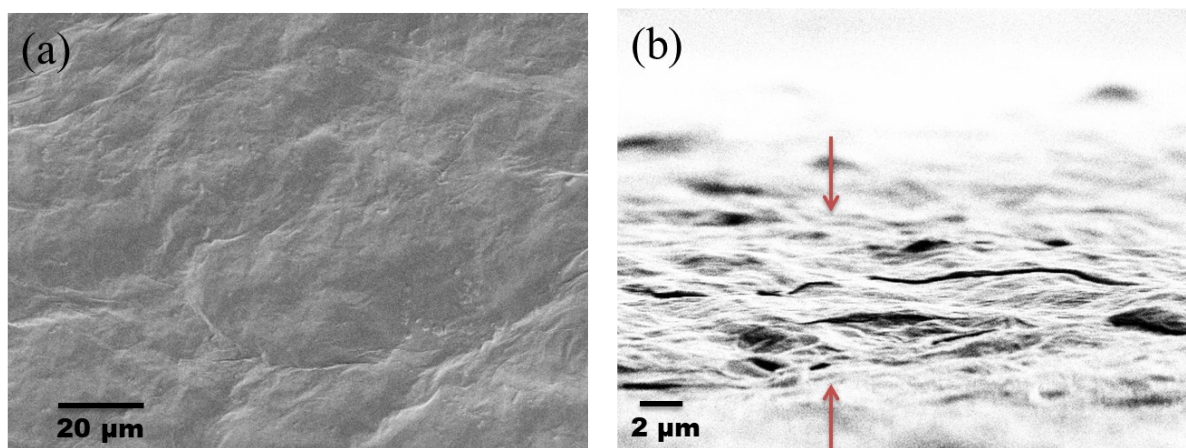

**Figure S3:** Micrograph showing the surface (a) and cross-sectional (b) morphology of free standing GO.

**Cross-sectional morphology of composites membrane:**

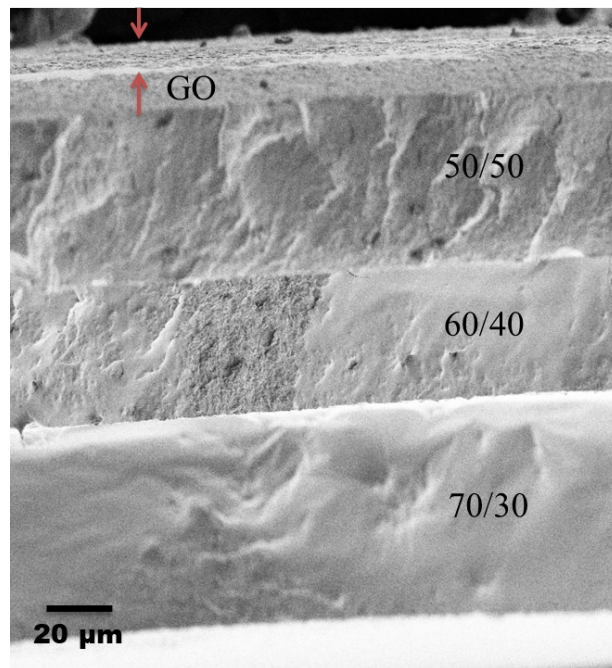

**Figure S4:** Micrograph showing the cross-sectional morphology of GO-PA modified composite membrane. It showing the overall thickness of the membrane in the range of 160-170 μm.
